# Supplementary material for: Residues of Pesticides and Heavy Metals in Polish Varietal Honey
Source: MDPI journal article supplement (doi:10.3390/foods11152362), 2022-08-06
Supplement: s1 [file s1]

**Table S1.** Limit of quantification (LOQ) for the analysed pesticides.

| Compound                                                                                                                                                                                                                                                                                                                                                                                                                                                                                                                                                                                                                                                                                                                                                                                                                                                                                                                                                                                                                                                                                                                                                                                                                                                                                                                                                                                                                                                                                                                                                                                                                                                                                                                    | LOQ<br>(mg/kg) |
|-----------------------------------------------------------------------------------------------------------------------------------------------------------------------------------------------------------------------------------------------------------------------------------------------------------------------------------------------------------------------------------------------------------------------------------------------------------------------------------------------------------------------------------------------------------------------------------------------------------------------------------------------------------------------------------------------------------------------------------------------------------------------------------------------------------------------------------------------------------------------------------------------------------------------------------------------------------------------------------------------------------------------------------------------------------------------------------------------------------------------------------------------------------------------------------------------------------------------------------------------------------------------------------------------------------------------------------------------------------------------------------------------------------------------------------------------------------------------------------------------------------------------------------------------------------------------------------------------------------------------------------------------------------------------------------------------------------------------------|----------------|
| 2,4'-DDT; 4,4'-DDD; 4,4'-DDE; 4,4'-DDT; Acetamiprid; Aldrin; alpha-HCH;<br>Amidosulfuron; Asulam; Azoxystrobin; beta-HCH; Bifenthrin; Bixafen; Boscalid;<br>Bupirimate; Chlomezone; Chlorantraniliprole; Chlorpyrifos-methyl; Chlorpropham;<br>Chlorosulfuron; Chlortoluron; Chloridazon; cis-Chlordane; cis-Epoxy heptachlor;<br>Cymoxanil; Cyproconazole; Desmedipham; Difenconazole; Dimethachlor; Dimethoate;<br>Dimethomorph; Dimoxystrobin; DMF (2,4-dimethylphenylformamide) (amitraz<br>metabolite); Etofenprox; Fenmedipham; Fenpropimorph; Fention-sulfoxide (fenthion<br>metabolite); Fipronil; Fipronil-desulfinyl (fipronil metabolite); Flazasulfuron;<br>Florasulam; Fluchinkonazole; Flufenacet; Flusilazole; Foramsulfuron; HCB; Heptachlor;<br>Heptenofos; Imidacloprid; Imidacloprid-urea derivative (metabolite of imidacloprid);<br>Carbendazim; Clothianidin; Coumaphos; Mandipropamid; Metalaxyl-M (Metalaxyl);<br>Metazachlor; Methiocarb; Methiocarb sulfone (methiocarb metabolite); Methiocarb<br>sulfoxide (methiocarb metabolite); Metconazole; Metolachlor-S; Metrafenone;<br>Metsulfuron-methyl; Methidation; Mesosulfuron-methyl; NAD (1-Naphthylacetamide);<br>Napropamide; Nicosulfuron; Oxychlordane; Parathion-methyl; Parathion-methyl;<br>Pencycuron; Pethoxamide; Pyraclostrobin; Pirimicarb; Pirimicarb-desmethyl (metabolite<br>of pirimicarb); Prochloraz; Propiconazole; Propyzamide; Rimsulfuron; Silthiopham;<br>Spirotetramat; Spirotetramat-enol (metabolite of spirotetramat); Sulfosulfuron; tau-<br>Fluvalinate; Tebuconazole; Tefluthrin; Terbutylazine; Tetraconazole; Thiamethoxam;<br>Thiacloprid; Thifensulfuron-methyl; trans-Chlordane; Triadimefon; Vinclozolin   | 0.001          |
| Acetochlor; alpha-Cypermethrin; alpha-Endosulfan; azinphos-ethyl; azinphos-methyl;<br>6-hydroxy bentazone (bentazone metabolite); beta-Cyfluthrin; beta-Endosulfan;<br>Bifenazate; Bifenox; Bromopropylate; Quinochlamine; Chizalofop-P-ethyl;<br>Chlorfenvinphos; Chlorpyrifos; cis-Permethrin; Cyflufenamid; lambda-Cyhalothrin;<br>Cyazofamid; Cycloxydim; Cyprodinil; Deltamethrin; Diazinon, Dieldrin; Diflufenican;<br>Endrin; Epoxiconazole; Esfenvalerate; Etoprophos; Fenazaquin; Fenbuconazole;<br>Fenhexamid; Fenitrothion, Fenpropidin; Fention; Fention-sulfide (a metabolite of<br>fenthion); Fipronil-sulfide (metabolite of fipronil); Flonicamid; Fludioxonil;<br>Flurochloridone; Flutriafol; Fosalon; Fosmet, Hexithiazox; IBA (Indolylbutyric acid);<br>Imazalil; Imidacloprid-olefin (metabolite of imidacloprid); Ipconazole; Isoproturon;<br>Isopyrazam; Iodosulfuron-methyl sodium; Carbetamide; Carboxin; Ethyl carfentrazone;<br>Clethodim; Clofentezine; Methyl msime; Lenacil; Lindane (gamma-HCH); Linuron;<br>Malathion; Mepaniprym; Metamitron; Methoxyfenozide; Metribuzin; MITC (methyl<br>isothiocyanate) (metabolite of metam and dazomet); Myclobutanil; Pendimethalin;<br>Profenofos; Pyrazophos; Pyrimethanil; Pyrimiphos ethyl; Pyrimiphos-methyl;<br>Prothioconazole-desthio (metabolite of prothioconazole); Endosulfan sulfate; Spinosin<br>A; Spirodiclofen; Spirotetramat-enol glucoside (metabolite of spirotetramat);<br>Spirotetramat-keto hydroxy (metabolite of spirotetramat); Tepraloxym; Tetramethrin;<br>Thiacloprid-amide (metabolite of thiacloprid); Tralkoxydim; trans-Epoxy of<br>heptachlor; trans-Permethrin; Trifloxystrobin; Triticonazole; zeta-Cypermethrin | 0.005          |
| 4,4-Methoxychlor; 6-chloro-4-hydroxy-3-phenyl pyridazine (metabolite of Pyridate);<br>Chlorothalonil; Cymiazole; Diflubenzuron; Ethofumesate; Etoazole; Phenoxaprop-P-<br>ethyl; Fipronil-sulfone (metabolite of fipronil); Fipronil-carboxamide (metabolite of<br>fipronil); Fluazifop-P-butyl; Phoxim; Indoxacarb; Iprodione; Mesotrione; Nitenpyram;<br>Picoxystrobin; Proquinazid; Propachizafop; Propamocarb; Prosulfocarb; Resmethrin;<br>Spiroxamine; Tebufenozide; Tebufenpyrad; Triadimenol; Triazinphos                                                                                                                                                                                                                                                                                                                                                                                                                                                                                                                                                                                                                                                                                                                                                                                                                                                                                                                                                                                                                                                                                                                                                                                                           | 0.01           |

|                                                                                                                                                                                                                             |      |
|-----------------------------------------------------------------------------------------------------------------------------------------------------------------------------------------------------------------------------|------|
| Bentazone; Quinoxifen; Chizalofop-P-tefuryl; DMPF (N-(2,4-dimethylphenyl)-N'-methylformamidine) (metabolite of amitraz); Fenpyroximate; Chymexazol; Pyriproxyfen; Propargit; Teflubenzuron; Tembotrione; Thiophanate-methyl | 0.05 |
| Sodium propoxycarbazone; Sulcotrione                                                                                                                                                                                        | 0.1  |
